# Supplementary material for: Body Composition Assessment and Mediterranean Diet Adherence in U12 Spanish Male Professional Soccer Players: Cross-Sectional Study
Source: MDPI journal article supplement (doi:10.3390/nu13114045), 2021-11-12
Supplement: s1 [file s1]

Supplemental material

# Body Composition Assessment and Mediterranean Diet Adherence in U12 Spanish-male Professional Soccer Players: Cross-Sectional Study

Guillermo Santos-Sánchez<sup>†</sup>, Ivan Cruz-Chamorro<sup>†</sup>, José Luis Perza-Castillo, Néstor Vicente-Salar

**Table S1.** Anthropometric parameters by field position in the 8–10 years group.

| Antropometric parameters          | Goalkeeper ( <i>n</i> =4) | Defender ( <i>n</i> =8) | Midfielder ( <i>n</i> =8) | Forward ( <i>n</i> =6) |
|-----------------------------------|---------------------------|-------------------------|---------------------------|------------------------|
| Age (years)                       | 8.57 ± 0.38               | 9.22 ± 0.67             | 8.62 ± 0.49               | 9.05 ± 0.81            |
| Weight (kg)                       | 32.20 ± 2.03              | 31.86 ± 3.08            | 29.21 ± 2.90              | 29.33 ± 4.67           |
| Height (cm)                       | 139.25 ± 5.51             | 137.03 ± 6.53           | 133.74 ± 5.29             | 131.57 ± 6.90          |
| BMI (kg/m <sup>2</sup> )          | 16.70 ± 2.16              | 16.95 ± 0.86            | 16.31 ± 1.10              | 16.26 ± 1.44           |
| Weight percentile                 | 79.29 ± 14.11             | 65.47 ± 17.59           | 62.91 ± 16.72             | 44.11 ± 32.90          |
| Height percentile                 | 81.80 ± 20.28             | 61.62 ± 26.87           | 64.10 ± 20.49             | 38.38 ± 31.45*         |
| BMI percentile                    | 54.99 ± 29.80             | 61.25 ± 14.76           | 54.51 ± 22.76             | 49.50 ± 31.01          |
| Triceps skinfold (mm)             | 9.10 ± 3.08               | 8.71 ± 3.24             | 8.45 ± 1.35               | 7.27 ± 1.97            |
| Calf skinfold (mm)                | 8.45 ± 2.32               | 7.25 ± 2.64             | 7.69 ± 1.95               | 6.97 ± 1.35            |
| Body fat (Slaughter equation) (%) | 13.90 ± 3.79              | 12.73 ± 4.14            | 12.86 ± 1.95              | 11.46 ± 2.35           |
| Body fat (kg)                     | 4.53 ± 1.57               | 4.04 ± 1.30             | 3.79 ± 0.87               | 3.32 ± 1.13            |

Data are represented as mean ± standard deviation (SD). \*,  $p \leq 0.05$  compared to the goalkeeper group. BMI, body mass index.

**Table S2.** Anthropometric parameters by field position in the 10-12 years group.

| Antropometric parameters          | Goalkeeper (n=7) | Defender (n=11) | Midfielder (n=16) | Forward (n=10) |
|-----------------------------------|------------------|-----------------|-------------------|----------------|
| Age (years)                       | 11.13 ± 0.59     | 10.84 ± 0.40    | 11.20 ± 0.51      | 10.91 ± 0.58   |
| Weight (kg)                       | 40.14 ± 3.71     | 35.35 ± 3.50**  | 37.43 ± 4.85      | 36.80 ± 4.68   |
| Height (cm)                       | 145.86 ± 7.25    | 141.96 ± 5.69   | 146.54 ± 5.86     | 147.58 ± 8.94  |
| BMI (kg/m <sup>2</sup> )          | 18.93 ± 1.91     | 17.52 ± 1.11    | 17.35 ± 1.14      | 16.88 ± 1.36*  |
| Weight percentile                 | 70.09 ± 14.87    | 52.13 ± 14.39*  | 52.27 ± 24.28     | 58.23 ± 17.39  |
| Height percentile                 | 62.46 ± 29.85    | 48.98 ± 22.97   | 59.26 ± 28.10     | 68.93 ± 29.22  |
| BMI percentile                    | 69.10 ± 24.90    | 56.52 ± 17.28   | 49.93 ± 18.30*    | 45.33 ± 20.88* |
| Triceps skinfold (mm)             | 12.13 ± 3.89     | 9.86 ± 3.21     | 9.83 ± 2.93       | 8.52 ± 2.04    |
| Calf skinfold (mm)                | 11.66 ± 3.34     | 9.67 ± 3.14     | 8.44 ± 3.42**     | 7.90 ± 3.27**  |
| Body fat (Slaughter equation) (%) | 18.48 ± 5.06     | 15.35 ± 4.32    | 14.43 ± 4.52*     | 13.07 ± 3.68*  |
| Body fat (kg)                     | 7.40 ± 2.08      | 5.48 ± 1.87*    | 5.56 ± 2.43*      | 4.86 ± 1.71**  |

Data are represented as mean ± standard deviation (SD). \*,  $p \leq 0.05$ ; \*\*,  $p \leq 0.01$  compared to the goalkeeper group. BMI, body mass index.

**Table S3.** Mediterranean diet quality index in the different groups

|                     | 8-10 years ( <i>n</i> = 26) | 11-12 years ( <i>n</i> = 45) | p-value | Total ( <i>n</i> = 71) |
|---------------------|-----------------------------|------------------------------|---------|------------------------|
| <b>KIDMED score</b> | 7.50 ± 2.06                 | 8.15 ± 1.93                  | 0.210   | 7.83 ± 2.03            |

Mean of score values ± standard deviation obtained from the Mediterranean diet adherence test (KIDMED). p-value calculated between the 8-10 and 11-12 years groups.

**Table S4.** Non-parametric Spearman's correlations

|                               | Spearman's r | p-value |
|-------------------------------|--------------|---------|
| <b>Weight (kg)</b>            | 0.2042       | 0.103   |
| <b>BMI (kg/m<sup>2</sup>)</b> | -0,1343      | 0.279   |
| <b>Body Fat (%)</b>           | -0,1902      | 0.132   |

Non-parametric Spearman's correlations between KIDMED score and body composition parameters. BMI, body mass index.

**Table S5.** Details of the responses for each item of the KIDMED test by groups.

| ITEMS | Group 1<br>Goalkeeper + Defender<br>(n=31) |        | Group 2<br>Midfielder + Forward<br>(n=40) |        |
|-------|--------------------------------------------|--------|-------------------------------------------|--------|
|       | Yes (%)                                    | No (%) | Yes (%)                                   | No (%) |
| 1     | 80,65                                      | 19,35  | 82,50                                     | 17,50  |
| 2     | 41,94                                      | 58,06  | 57,50                                     | 42,50  |
| 3     | 45,16                                      | 54,84  | 62,50                                     | 37,50  |
| 4     | 12,90                                      | 87,10  | 25,00                                     | 75,00  |
| 5     | 74,19                                      | 25,81  | 67,50                                     | 32,50  |
| 6     | 16,13                                      | 83,87  | 15,00                                     | 85,00  |
| 7     | 96,77                                      | 3,23   | 100,00                                    | 0,00   |
| 8     | 93,55                                      | 6,45   | 87,50                                     | 12,50  |
| 9     | 93,55                                      | 6,45   | 80,00                                     | 20,00  |
| 10    | 22,58                                      | 77,42  | 32,50                                     | 67,50  |
| 11    | 100,00                                     | 0,00   | 100,00                                    | 0,00   |
| 12    | 25,81                                      | 74,19  | 17,50                                     | 82,50  |
| 13    | 93,55                                      | 6,45   | 90,00                                     | 10,00  |
| 14    | 32,26                                      | 67,74  | 17,50                                     | 82,50  |
| 15    | 67,74                                      | 32,26  | 72,50                                     | 27,50  |
| 16    | 25,81                                      | 74,19  | 12,50                                     | 87,50  |

**Table S6.** Main beverages consume and use of supplements by groups

|                    | <b>Group 1</b>                      |               | <b>Group 2</b>                     |               |
|--------------------|-------------------------------------|---------------|------------------------------------|---------------|
|                    | <b>Goalkeeper + Defender (n=30)</b> |               | <b>Midfielder + Forward (n=40)</b> |               |
|                    | <b>Yes (%)</b>                      | <b>No (%)</b> | <b>Yes (%)</b>                     | <b>No (%)</b> |
| Water              | 28 (93,3%)                          | 2 (6,7%)      | 35 (87,5%)                         | 5 (12,5%)     |
| Commercial juices  | 14 (46,7%)                          | 16 (53,3%)    | 19 (47,5%)                         | 21 (52,5%)    |
| Soft drinks        | 10 (33,3%)                          | 20 (66,7%)    | 15 (37,5%)                         | 25 (62,5%)    |
| Use of Supplements | 2 (6,7%)*                           | 28 (93,3%)    | 10 (25%)*                          | 30 (75%)      |

\* Significantly different between groups at  $p = 0.038$ .
